# Supplementary material
Source: publisher figshare collection journal article supplement (https://tandf.figshare.com/ndownloader/files/12285704)
Supplement: Supplementary file 1 [file 12285704]

**Appendix S1**

**Electronic search strategy**

**MEDLINE**

1. ((((("Tooth Socket"[Mesh]) OR "Tooth Extraction"[Mesh:NoExp]) OR "Periodontal Diseases"[Mesh:NoExp]) OR "Periapical Periodontitis"[Mesh]) OR "Tooth Fractures"[Mesh]) OR "Alveolar Bone Loss"[Mesh] 54032
2. (("Dental Implants"[Mesh]) OR "Dental Prosthesis, Implant-Supported"[Mesh]) OR "Dental Implantation"[Mesh] 26845
3. Tooth[tiab] OR teeth[tiab] OR Dentalis[tiab] OR dental[tiab] OR Alveolus [tiab] OR Alveolar[tiab] OR Dentali[tiab] OR Periapical[tiab] OR periodontal[tiab] OR periodontally[tiab] 369552
4. Extractions[tiab] OR Extractions[tiab] OR Loss[tiab] OR Socket[tiab] OR Fractures[tiab] OR lesion[tiab] OR Lesions[tiab] 1411096
5. implant[tiab] OR implants[tiab] OR Implantation[tiab] 224217
6. 3 AND 5 20285
7. 2 OR 6 34317
8. 3 AND 4 43800
9. 1 OR 8 87210
10. 7 AND 9 8347
11. infect*[tiab] OR immedi*[tiab] 1636332
12. 10 AND 11 2160
13. 12 NOT "review"[Publication Type] OR "review literature as topic"[MeSH Terms] 1949
14. 13 NOT animals[Mesh Term] NOT (humans[Mesh Term] AND animals[Mesh Term]) 1759

**EMBASE**

1. 'tooth socket'/exp OR 'tooth extraction'/exp OR 'periodontal disease'/de OR 'tooth periapical disease'/exp OR 'tooth fracture'/exp OR 'alveolar bone loss'/exp 71479
2. 'tooth implant'/de OR 'tooth implantation'/exp 26473
3. Tooth:ab,ti OR teeth:ab,ti OR Dentalis:ab,ti OR dental:ab,ti OR Alveolus:ab,ti OR Alveolar:ab,ti OR Dentali:ab,ti OR Periapical:ab,ti OR periodontal:ab,ti OR periodontally:ab,ti 374616
4. Extractions:ab,ti OR Extractions:ab,ti OR Loss:ab,ti OR Socket:ab,ti OR Fractures:ab,ti OR lesion:ab,ti OR Lesions:ab,ti 1763873
5. implant:ab,ti OR implants:ab,ti OR Implantation:ab,ti 281433
6. 3 AND 5 18699
7. 2 OR 6 32056
8. 3 AND 4 45351
9. 1 OR 8 102745
10. 7 AND 9 7763
11. infect*:ab,ti OR immedi*:ab,ti 1961095
12. 10 AND 11 1958
13. 12 NOT 'review'/it 1777
14. 13 NOT NOT ('animal experiment'/de OR 'animal model'/de OR 'animal tissue'/de OR 'human tissue'/de OR 'nonhuman'/de) 1661

**Cochrane Library, LILACS and Web of Science**

1. MeSH descriptor: [Tooth Socket] explode all trees 186
2. MeSH descriptor: [Tooth Extraction] this term only 1301
3. MeSH descriptor: [Periodontal Diseases] this term only 432
4. MeSH descriptor: [Periapical Periodontitis] explode all trees 120
5. MeSH descriptor: [Tooth Fractures] explode all trees 170
6. MeSH descriptor: [Alveolar Bone Loss] explode all trees 884
7. MeSH descriptor: [Dental Implants] explode all trees 1036
8. MeSH descriptor: [Dental Prosthesis, Implant-Supported] explode all trees 587
9. MeSH descriptor: [Dental Implantation] explode all trees 801
10. Tooth or teeth or Dentalis or dental or Alveolus or Alveolar or Dentali or Periapical or periodontal or periodontally:ti,ab,kw 24233
11. Extractions or Extractions or Loss or Socket or Fractures or lesion or Lesions:ti,ab,kw 69722
12. implant or implants or Implantation:ti,ab,kw 15707
13. 10 AND 12 2030
14. 7-9 / OR 1341
15. 13 OR 14 2030
16. 10 AND 11 6162
17. 1-6 / OR 2794
18. 16 AND 17 2418
19. 15 AND 18 634
20. infect* or immedi*:ti,ab,kw 92662
21. 19 AND 20 208
22. 21 / Trial 193
